# Supplementary material
Source: PubMed Central journal article supplement (PMC5792317)
Supplement: NIHMS921357-supplement-10048_2017_529_MOESM1_ESM.pdf [file NIHMS921357-supplement-10048_2017_529_MOESM1_ESM.pdf]

**ESM\_1** Oligos used for *GABRA4* long-range PCR amplification

| <b>Oligo Name</b> | <b>Sequence 5'-3'</b>      | <b>Size (bp)</b> | <b>Amplicon Genome Position</b> | <b>Overlap With Next Amplicon (bp)</b> |
|-------------------|----------------------------|------------------|---------------------------------|----------------------------------------|
| GABRA4_LR1_F      | CTGGGTGACTAGGTCATAGAATAGG  | 8736             | chr4.hg19:46918162-46926897     | 210                                    |
| GABRA4_LR1_R      | CTCATTTATAACAGGGAGGAGGTG   |                  |                                 |                                        |
| GABRA4_LR2_F      | GGTAGGGAAACCTTAGTTTGAAGC   | 8980             | chr4.hg19:46926687-46935666     | 230                                    |
| GABRA4_LR2_R      | GTGCCAGATAGATCAGCAGATACC   |                  |                                 |                                        |
| GABRA4_LR3_F      | AGTCTGGCTGAGAATGCCTTAG     | 8913             | chr4.hg19:46935436-46944348     | 251                                    |
| GABRA4_LR3_R      | AAGTGAGTGACAGACGAAGAAGTG   |                  |                                 |                                        |
| GABRA4_LR4_F      | ATCCAGCCATCTAGTTACTCATCC   | 8878             | chr4.hg19:46944097-46952974     | 50                                     |
| GABRA4_LR4_R      | CCCAGTATAGGTTTTCTGGCTATG   |                  |                                 |                                        |
| GABRA4_LR5_F      | GCGAGTATTAGATTCCTTCCTTC    | 8720             | chr4.hg19:46952924-46961643     | 154                                    |
| GABRA4_LR5_R      | CTCCCTGAAACATACTTCCTGACTAC |                  |                                 |                                        |
| GABRA4_LR6_F      | ATCTTCTTGACCTTGATGTGC      | 8968             | chr4.hg19:46961489-46970456     | 27                                     |
| GABRA4_LR6_R      | TCCAGAAGTCTGAGTGAGATTAC    |                  |                                 |                                        |
| GABRA4_LR7_F      | CCATGTAATCTCACTCAGCAGTTC   | 8818             | chr4.hg19:46970429-46979246     | 417                                    |
| GABRA4_LR7_R      | CCCTCCCTTCCTTCTATTTAGA     |                  |                                 |                                        |
| GABRA4_LR8_F      | CCAGCCAATTGTGACTAAGACTAC   | 8930             | chr4.hg19:46978829-46987758     | 190                                    |
| GABRA4_LR8_R      | AGGGTTAGGATGTATCCATTGC     |                  |                                 |                                        |
| GABRA4_LR9_F      | GCTTAGAGTATAAGGCGGTGATGT   | 8856             | chr4.hg19:46987568-46996423     | 25                                     |
| GABRA4_LR9_R      | GTCAACCTCTGGAAGTAAGTCAACTC |                  |                                 |                                        |
| GABRA4_LR10_F     | GAGTTGACTTACTTCCAGAGGTTGAC | 8790             | chr4.hg19:46996398-47005187     | -                                      |
| GABRA4_LR10_R     | CATGTGAAGATACATGGAGGACTG   |                  |                                 |                                        |
