# Supplementary material
Source: PubMed Central journal article supplement (PMC5792317)
Supplement: NIHMS921357-supplement-10048_2017_529_MOESM2_ESM.pdf [file NIHMS921357-supplement-10048_2017_529_MOESM2_ESM.pdf]

**ESM\_2** Table of all single nucleotide variants identified in the *GABRA4* region

| <b>Variant</b>        | <b>dbSNP138 ID</b> | <b>Functional Category</b> | <b>ASD Cases MAF</b> | <b>Controls MAF</b> | <b>GERP Score</b> |
|-----------------------|--------------------|----------------------------|----------------------|---------------------|-------------------|
| chr4.hg19:46918218G>T | rs77362300         | intergenic                 | 0.1296               | 0.1574              | -0.6              |
| chr4.hg19:46918242A>C | rs7693882          | intergenic                 | 0.3659               | 0.3182              | -2.42             |
| chr4.hg19:46918337A>G | rs10032182         | intergenic                 | 0.3659               | 0.3273              | 2.97              |
| chr4.hg19:46918455T>G | .                  | intergenic                 | 0                    | 0.009091            | -2.39             |
| chr4.hg19:46918800A>G | .                  | intergenic                 | 0.02439              | 0                   | -0.759            |
| chr4.hg19:46919089T>C | rs6815290          | intergenic                 | 0.3659               | 0.3273              | 3.09              |
| chr4.hg19:46919327G>T | rs77352552         | intergenic                 | 0.02439              | 0.04545             | 3.27              |
| chr4.hg19:46919452T>C | rs185137287        | intergenic                 | 0.006098             | 0                   | -9.79             |
| chr4.hg19:46919749T>G | rs11722432         | intergenic                 | 0.3659               | 0.3273              | 0.728             |
| chr4.hg19:46919774A>T | rs9990965          | intergenic                 | 0.3659               | 0.3273              | -3.08             |
| chr4.hg19:46920789G>A | rs10004359         | intergenic                 | 0.3659               | 0.3273              | 1.43              |
| chr4.hg19:46921142A>G | .                  | UTR3                       | 0                    | 0.009091            | -0.556            |
| chr4.hg19:46921546C>A | .                  | UTR3                       | 0.006098             | 0                   | -5.72             |
| chr4.hg19:46921954C>T | rs7691100          | UTR3                       | 0.3659               | 0.3273              | -1.36             |
| chr4.hg19:46922096A>C | .                  | UTR3                       | 0.006098             | 0                   | -0.295            |
| chr4.hg19:46922107T>C | rs7678338          | UTR3                       | 0.3659               | 0.3273              | 0.118             |
| chr4.hg19:46922553A>G | .                  | UTR3                       | 0                    | 0.009091            | 0.472             |
| chr4.hg19:46922688C>T | rs10033500         | UTR3                       | 0.3642               | 0.3241              | -0.121            |
| chr4.hg19:46922930G>T | .                  | UTR3                       | 0.02439              | 0                   | 1.06              |
| chr4.hg19:46922950A>G | rs9291296          | UTR3                       | 0.3659               | 0.3273              | 1.07              |
| chr4.hg19:46923108A>C | rs9291297          | UTR3                       | 0.3659               | 0.3273              | -4.41             |
| chr4.hg19:46923426A>G | .                  | UTR3                       | 0                    | 0.009091            | -0.185            |
| chr4.hg19:46923434A>C | .                  | UTR3                       | 0.006098             | 0                   | 0.531             |
| chr4.hg19:46923579A>G | rs16859680         | UTR3                       | 0.006098             | 0                   | 0.852             |
| chr4.hg19:46924311G>A | .                  | UTR3                       | 0                    | 0.009091            | 1.24              |
| chr4.hg19:46924725C>T | rs114810504        | UTR3                       | 0.01829              | 0.02727             | -0.392            |
| chr4.hg19:46925000G>A | rs1512140          | UTR3                       | 0.3659               | 0.3273              | 0.199             |
| chr4.hg19:46925095T>G | rs55731723         | UTR3                       | 0.0122               | 0.03636             | 1.47              |
| chr4.hg19:46925813A>G | rs953380           | UTR3                       | 0.3659               | 0.3273              | 2.44              |
| chr4.hg19:46926777T>G | rs1512139          | UTR3                       | 0.3642               | 0.3273              | -0.465            |
| chr4.hg19:46926837G>A | rs9291298          | UTR3                       | 0.3659               | 0.3273              | 1.17              |
| chr4.hg19:46926840T>C | .                  | UTR3                       | 0.0122               | 0                   | 1.06              |
| chr4.hg19:46927124T>C | rs17599074         | UTR3                       | 0.3544               | 0.3333              | -0.613            |
| chr4.hg19:46927138G>A | rs139379428        | UTR3                       | 0                    | 0.01818             | -4.89             |
| chr4.hg19:46927145T>G | rs1398174          | UTR3                       | 0.359                | 0.3426              | 3.36              |
| chr4.hg19:46927765T>C | .                  | UTR3                       | 0                    | 0.01852             | -0.261            |
| chr4.hg19:46927774T>C | rs200726027        | UTR3                       | 0.006173             | 0.009091            | 0                 |
| chr4.hg19:46927886C>T | rs10004905         | UTR3                       | 0.3506               | 0.3426              | -1.52             |
| chr4.hg19:46928029A>G | rs4637372          | UTR3                       | 0.359                | 0.3426              | 0.158             |
| chr4.hg19:46928152T>C | rs149904224        | UTR3                       | 0.006173             | 0                   | -4.15             |
| chr4.hg19:46928156A>G | .                  | UTR3                       | 0.006098             | 0                   | -1.22             |
| chr4.hg19:46928746A>T | rs6447517          | UTR3                       | 0.3608               | 0.3333              | -2.92             |
| chr4.hg19:46928834C>T | rs17599102         | UTR3                       | 0.3442               | 0.3333              | -0.128            |
| chr4.hg19:46929004G>A | rs141391324        | UTR3                       | 0.006098             | 0.009091            | -4.78             |

|                       |             |          |          |          |        |
|-----------------------|-------------|----------|----------|----------|--------|
| chr4.hg19:46929433G>T | .           | UTR3     | 0.006098 | 0        | 1.16   |
| chr4.hg19:46929668G>C | rs7660336   | UTR3     | 0.35     | 0.3426   | -2.65  |
| chr4.hg19:46929885G>T | .           | UTR3     | 0.006098 | 0.02727  | -0.627 |
| chr4.hg19:46929991A>G | .           | UTR3     | 0.006098 | 0        | 2.59   |
| chr4.hg19:46930035C>A | rs371234747 | UTR3     | 0        | 0.009091 | 3.48   |
| chr4.hg19:46930104A>G | rs141747680 | UTR3     | 0.01875  | 0.02727  | 0.204  |
| chr4.hg19:46931054T>A | rs1512138   | intronic | 0.3544   | 0.3426   | -1.75  |
| chr4.hg19:46931463C>G | rs116008237 | intronic | 0.006098 | 0.01818  | 0.542  |
| chr4.hg19:46931651A>G | .           | intronic | 0.006098 | 0        | -0.741 |
| chr4.hg19:46931939G>C | rs184383940 | intronic | 0        | 0.009091 | -2.57  |
| chr4.hg19:46932206T>C | rs1512136   | intronic | 0.3544   | 0.3333   | -9     |
| chr4.hg19:46932672A>G | rs115643308 | intronic | 0.01829  | 0.01818  | -1.57  |
| chr4.hg19:46933123T>C | rs67128139  | intronic | 0.3563   | 0.3426   | -0.855 |
| chr4.hg19:46933241C>T | rs190152917 | intronic | 0.0122   | 0.009091 | -0.291 |
| chr4.hg19:46933310C>T | rs13138566  | intronic | 0.3544   | 0.3426   | -0.623 |
| chr4.hg19:46933966T>C | rs17641386  | intronic | 0.3544   | 0.3333   | -1.43  |
| chr4.hg19:46933990T>C | rs17599158  | intronic | 0.3563   | 0.3333   | -3.35  |
| chr4.hg19:46934014T>G | rs12508654  | intronic | 0.3563   | 0.3333   | -3.48  |
| chr4.hg19:46934233A>G | rs74994602  | intronic | 0.01829  | 0.009091 | 2.88   |
| chr4.hg19:46934481A>G | rs10021503  | intronic | 0.3519   | 0.3333   | -1.5   |
| chr4.hg19:46934615C>T | rs138673560 | intronic | 0.006098 | 0.009091 | -1.67  |
| chr4.hg19:46934661T>C | .           | intronic | 0.006098 | 0        | 0.129  |
| chr4.hg19:46935036A>C | rs35989353  | intronic | 0.3608   | 0.3426   | 0.565  |
| chr4.hg19:46935051G>A | .           | intronic | 0        | 0.009091 | 1.01   |
| chr4.hg19:46935292A>G | .           | intronic | 0.006098 | 0        | 2.22   |
| chr4.hg19:46935354A>G | rs34026660  | intronic | 0        | 0.009091 | 3.51   |
| chr4.hg19:46935791A>G | rs111742151 | intronic | 0        | 0.009091 | -0.48  |
| chr4.hg19:46936183A>G | rs188935567 | intronic | 0        | 0.009091 | 5.19   |
| chr4.hg19:46936319T>G | .           | intronic | 0        | 0.009091 | 5.15   |
| chr4.hg19:46936822C>T | rs1159396   | intronic | 0.358    | 0.3364   | 0.879  |
| chr4.hg19:46936899A>G | rs6843462   | intronic | 0.358    | 0.3273   | 2.15   |
| chr4.hg19:46937023C>T | rs75822667  | intronic | 0.03049  | 0.01818  | -5.24  |
| chr4.hg19:46937694G>T | rs147391393 | intronic | 0        | 0.01818  | 0.158  |
| chr4.hg19:46937719A>G | .           | intronic | 0.006173 | 0        | 0.158  |
| chr4.hg19:46937725G>A | rs1877398   | intronic | 0.3625   | 0.3273   | 0.158  |
| chr4.hg19:46937797C>T | .           | intronic | 0        | 0.009091 | 0.475  |
| chr4.hg19:46938408G>A | .           | intronic | 0        | 0.009091 | -0.237 |
| chr4.hg19:46938519G>A | rs12649623  | intronic | 0.358    | 0.3273   | -0.237 |
| chr4.hg19:46938725A>T | .           | intronic | 0.006098 | 0        | 2.15   |
| chr4.hg19:46939088G>C | .           | intronic | 0        | 0.009091 | -0.858 |
| chr4.hg19:46939366T>C | .           | intronic | 0.01852  | 0        | -1.34  |
| chr4.hg19:46939651C>A | rs189857459 | intronic | 0.03125  | 0.009091 | -0.309 |
| chr4.hg19:46939779T>C | .           | intronic | 0.00625  | 0        | -3.49  |
| chr4.hg19:46940376T>C | rs713287    | intronic | 0.3537   | 0.3273   | -1.17  |
| chr4.hg19:46940756G>A | .           | intronic | 0.006173 | 0        | -1.54  |
| chr4.hg19:46941228G>A | rs145042590 | intronic | 0        | 0.009091 | 0.248  |
| chr4.hg19:46942361C>T | rs148088063 | intronic | 0.0125   | 0        | 1.28   |

|                       |             |          |          |          |         |
|-----------------------|-------------|----------|----------|----------|---------|
| chr4.hg19:46942867A>G | rs116695571 | intronic | 0        | 0.009091 | 0.537   |
| chr4.hg19:46943655G>A | .           | intronic | 0        | 0.009091 | 3.43    |
| chr4.hg19:46943726C>T | rs10021918  | intronic | 0.358    | 0.3273   | -3.9    |
| chr4.hg19:46944169C>A | rs2351170   | intronic | 0.3671   | 0.3273   | 0.669   |
| chr4.hg19:46944234A>G | rs1398177   | intronic | 0.3537   | 0.3241   | 0.925   |
| chr4.hg19:46944959C>T | rs10025379  | intronic | 0.3537   | 0.3208   | 0.421   |
| chr4.hg19:46945050A>C | rs144078895 | intronic | 0        | 0.009259 | -0.21   |
| chr4.hg19:46945416C>T | .           | intronic | 0        | 0.009091 | 2.3     |
| chr4.hg19:46945546C>T | rs76439792  | intronic | 0.0122   | 0        | -0.618  |
| chr4.hg19:46946723T>G | rs28497667  | intronic | 0.3519   | 0.2963   | -0.639  |
| chr4.hg19:46946832C>T | .           | intronic | 0.006098 | 0        | -3.43   |
| chr4.hg19:46946906C>A | rs11946433  | intronic | 0.08537  | 0.1      | 0.918   |
| chr4.hg19:46946970T>A | .           | intronic | 0.006098 | 0        | 0.474   |
| chr4.hg19:46947812A>C | rs146898865 | intronic | 0        | 0.009091 | 0.854   |
| chr4.hg19:46948167A>G | rs181166493 | intronic | 0.03049  | 0.009091 | -5.85   |
| chr4.hg19:46948675T>A | .           | intronic | 0.006098 | 0        | -1.09   |
| chr4.hg19:46948811A>G | .           | intronic | 0        | 0.009259 | 2.21    |
| chr4.hg19:46949319C>T | .           | intronic | 0.006098 | 0        | -6.39   |
| chr4.hg19:46949593A>G | rs1160091   | intronic | 0.358    | 0.3056   | -2.9    |
| chr4.hg19:46949662G>A | rs1160092   | intronic | 0.3537   | 0.3091   | -0.674  |
| chr4.hg19:46949770G>C | rs1160093   | intronic | 0.3537   | 0.3      | -0.81   |
| chr4.hg19:46950764C>A | .           | intronic | 0.006098 | 0        | -6.33   |
| chr4.hg19:46951126T>C | .           | intronic | 0        | 0.009091 | 0.304   |
| chr4.hg19:46951781G>A | rs13140528  | intronic | 0.3537   | 0.3148   | -0.361  |
| chr4.hg19:46952304C>T | .           | intronic | 0        | 0.009091 | -3.9    |
| chr4.hg19:46952471A>G | rs1512130   | intronic | 0.4634   | 0.463    | -0.997  |
| chr4.hg19:46952483G>A | rs368425575 | intronic | 0        | 0.01852  | -0.0536 |
| chr4.hg19:46952602A>G | rs1512131   | intronic | 0.3537   | 0.3148   | 1.81    |
| chr4.hg19:46952603G>T | .           | intronic | 0.006098 | 0        | -1.45   |
| chr4.hg19:46952923A>G | .           | intronic | 0.00625  | 0.01923  | -0.685  |
| chr4.hg19:46953347A>G | rs7680308   | intronic | 0.3765   | 0.3091   | 1.65    |
| chr4.hg19:46953507C>T | .           | intronic | 0        | 0.009091 | -1.81   |
| chr4.hg19:46953508G>A | rs150493499 | intronic | 0.03086  | 0.009091 | -7.59   |
| chr4.hg19:46953808T>C | rs1912959   | intronic | 0.372    | 0.3091   | 0       |
| chr4.hg19:46953861C>T | rs138269590 | intronic | 0.006098 | 0.009091 | 2.66    |
| chr4.hg19:46954745C>T | .           | intronic | 0.006098 | 0        | 3.21    |
| chr4.hg19:46954865A>T | .           | intronic | 0        | 0.009091 | 1.56    |
| chr4.hg19:46954887A>G | .           | intronic | 0.006173 | 0        | -6.69   |
| chr4.hg19:46954968C>T | rs9995416   | intronic | 0.372    | 0.3091   | 1.43    |
| chr4.hg19:46955027T>C | rs190935860 | intronic | 0.006098 | 0        | -0.465  |
| chr4.hg19:46955190T>C | rs78531037  | intronic | 0.0122   | 0.009091 | -2.11   |
| chr4.hg19:46955235C>T | rs77736837  | intronic | 0.006098 | 0.01818  | -1.51   |
| chr4.hg19:46956415A>T | rs34130578  | intronic | 0.372    | 0.3091   | 0.225   |
| chr4.hg19:46956567G>T | rs10023110  | intronic | 0.372    | 0.3091   | -0.841  |
| chr4.hg19:46957037A>G | rs62303699  | intronic | 0.01829  | 0        | -2.23   |
| chr4.hg19:46957120C>T | rs76523213  | intronic | 0.04268  | 0.02727  | -3.39   |
| chr4.hg19:46957130A>G | rs111248662 | intronic | 0.01829  | 0.01818  | -1.79   |

|                       |             |          |          |          |          |
|-----------------------|-------------|----------|----------|----------|----------|
| chr4.hg19:46957176C>T | rs10004131  | intronic | 0.372    | 0.3091   | -4.2     |
| chr4.hg19:46957305A>G | rs10015891  | intronic | 0.372    | 0.3091   | 0.652    |
| chr4.hg19:46957351A>C | .           | intronic | 0.006098 | 0        | -0.128   |
| chr4.hg19:46957469C>T | .           | intronic | 0.006098 | 0        | -4.03    |
| chr4.hg19:46957697T>G | rs7665758   | intronic | 0.372    | 0.3091   | -1.24    |
| chr4.hg19:46957782C>T | rs7683472   | intronic | 0.372    | 0.3091   | -2.55    |
| chr4.hg19:46957907C>T | rs138965607 | intronic | 0        | 0.009091 | 3.73     |
| chr4.hg19:46957971G>C | .           | intronic | 0.006098 | 0        | -1.32    |
| chr4.hg19:46958129T>A | rs113214449 | intronic | 0.006098 | 0        | 3.11     |
| chr4.hg19:46958290G>A | rs145390789 | intronic | 0.006098 | 0        | 2.06     |
| chr4.hg19:46958693T>C | rs1512132   | intronic | 0.3765   | 0.3091   | 1.17     |
| chr4.hg19:46958817C>T | rs1398172   | intronic | 0.372    | 0.3091   | -5.79    |
| chr4.hg19:46959108A>G | rs997070    | intronic | 0.3765   | 0.3091   | 2.08     |
| chr4.hg19:46959130T>C | rs192088458 | intronic | 0.006098 | 0.009091 | 0.0185   |
| chr4.hg19:46959208C>T | .           | intronic | 0        | 0.009091 | -0.317   |
| chr4.hg19:46959220T>A | rs997071    | intronic | 0.372    | 0.3091   | -4.45    |
| chr4.hg19:46959282C>A | rs9291300   | intronic | 0.006098 | 0        | 2.1      |
| chr4.hg19:46959321C>A | rs188481398 | intronic | 0.02439  | 0.009091 | -0.706   |
| chr4.hg19:46960007T>A | rs9291301   | intronic | 0.3659   | 0.3091   | 1.48     |
| chr4.hg19:46960268T>C | rs35561607  | intronic | 0.01829  | 0        | -2.56    |
| chr4.hg19:46960483C>T | .           | intronic | 0.006098 | 0        | 1.79     |
| chr4.hg19:46960502T>A | rs10011168  | intronic | 0.372    | 0.3091   | 3.33     |
| chr4.hg19:46960574G>A | rs144716040 | intronic | 0.006098 | 0.009091 | 0.148    |
| chr4.hg19:46960703A>G | rs183175971 | intronic | 0        | 0.009091 | 1.63     |
| chr4.hg19:46960727T>C | rs1512133   | intronic | 0.3765   | 0.3091   | 1.23     |
| chr4.hg19:46960730G>T | rs1512134   | intronic | 0.3765   | 0.3091   | -4.23    |
| chr4.hg19:46961097G>A | rs111602200 | intronic | 0.006173 | 0        | -7.65    |
| chr4.hg19:46961837A>G | .           | intronic | 0        | 0.009091 | -2.25    |
| chr4.hg19:46962081A>G | rs871207    | intronic | 0.3659   | 0.3019   | -1.41    |
| chr4.hg19:46962181G>A | rs871206    | intronic | 0.3659   | 0.3091   | 2.91     |
| chr4.hg19:46962535A>C | rs73247606  | intronic | 0.01829  | 0        | -2.93    |
| chr4.hg19:46962560C>T | rs2175553   | intronic | 0.3642   | 0.3056   | 3.01     |
| chr4.hg19:46962686G>A | rs13130440  | intronic | 0.3608   | 0.3019   | -0.00393 |
| chr4.hg19:46962819A>G | rs13107073  | intronic | 0.3659   | 0.3091   | -1.23    |
| chr4.hg19:46963222C>T | rs6844842   | intronic | 0.3625   | 0.3091   | 0.545    |
| chr4.hg19:46963459C>T | rs13138759  | intronic | 0.3625   | 0.3091   | -7.22    |
| chr4.hg19:46963461G>C | rs62303702  | intronic | 0.01829  | 0        | -2.29    |
| chr4.hg19:46963545G>A | rs12696822  | intronic | 0.3625   | 0.3091   | -0.177   |
| chr4.hg19:46963682A>T | rs78336370  | intronic | 0.01829  | 0.02727  | -0.643   |
| chr4.hg19:46964020G>A | .           | intronic | 0.006098 | 0        | 1.21     |
| chr4.hg19:46964055T>C | rs10023399  | intronic | 0.3659   | 0.3091   | -0.736   |
| chr4.hg19:46964107T>G | rs73247608  | intronic | 0.01829  | 0        | 0.716    |
| chr4.hg19:46964291A>G | .           | intronic | 0.006098 | 0        | -0.451   |
| chr4.hg19:46964295A>T | rs200735007 | intronic | 0.01235  | 0.009091 | 0.225    |
| chr4.hg19:46964421A>C | rs112148938 | intronic | 0.006098 | 0        | 0.225    |
| chr4.hg19:46964648A>G | rs1912961   | intronic | 0.3598   | 0.3091   | 0.225    |
| chr4.hg19:46965103T>C | rs147196611 | intronic | 0.02439  | 0.02727  | 0.235    |

|                       |             |          |          |          |         |
|-----------------------|-------------|----------|----------|----------|---------|
| chr4.hg19:46965642C>T | rs114151283 | intronic | 0        | 0.009091 | 0.235   |
| chr4.hg19:46965713G>T | rs1116735   | intronic | 0.3642   | 0.3091   | 0.235   |
| chr4.hg19:46965739A>G | rs10024828  | intronic | 0.3642   | 0.3091   | -0.47   |
| chr4.hg19:46965821G>C | .           | intronic | 0.006098 | 0        | 0.235   |
| chr4.hg19:46965973A>C | rs116740572 | intronic | 0.01829  | 0.009091 | 0.521   |
| chr4.hg19:46966120T>C | rs114197079 | intronic | 0.06707  | 0.06364  | 0.521   |
| chr4.hg19:46966249T>C | .           | intronic | 0        | 0.009091 | -1.04   |
| chr4.hg19:46966259A>G | rs4353875   | intronic | 0.3659   | 0.3091   | 0.521   |
| chr4.hg19:46966643C>T | .           | intronic | 0        | 0.009091 | -2.28   |
| chr4.hg19:46966725G>T | .           | intronic | 0        | 0.009091 | 0.00496 |
| chr4.hg19:46967279C>A | rs2055943   | intronic | 0.3395   | 0.3091   | -3.14   |
| chr4.hg19:46967304A>C | .           | intronic | 0.03165  | 0        | -1.08   |
| chr4.hg19:46967488C>T | rs2280074   | intronic | 0.3642   | 0.3091   | 0.294   |
| chr4.hg19:46967573G>C | rs2280073   | intronic | 0.3642   | 0.3091   | -0.501  |
| chr4.hg19:46967779G>A | rs112368161 | intronic | 0.0122   | 0.009091 | -3.5    |
| chr4.hg19:46968050T>C | rs2055942   | intronic | 0.3415   | 0.3091   | 0.182   |
| chr4.hg19:46968138T>C | rs2055941   | intronic | 0.3659   | 0.3091   | 2.36    |
| chr4.hg19:46968423C>T | .           | intronic | 0.006098 | 0        | -1      |
| chr4.hg19:46968755C>A | .           | intronic | 0.006098 | 0        | -6.03   |
| chr4.hg19:46969491C>T | .           | intronic | 0.006098 | 0        | 0.864   |
| chr4.hg19:46969502C>T | .           | intronic | 0        | 0.009091 | -3.99   |
| chr4.hg19:46970196C>A | rs7698023   | intronic | 0.3642   | 0.3091   | 4.05    |
| chr4.hg19:46970226T>G | rs181929290 | intronic | 0.01852  | 0        | -0.0369 |
| chr4.hg19:46970330G>T | rs186574614 | intronic | 0        | 0.009091 | -3.28   |
| chr4.hg19:46970411A>G | rs112200490 | intronic | 0.03659  | 0.04545  | 1.27    |
| chr4.hg19:46970477T>A | .           | intronic | 0.006098 | 0        | 0.353   |
| chr4.hg19:46970716T>A | rs17599367  | intronic | 0.01829  | 0        | 0.721   |
| chr4.hg19:46970998A>G | .           | intronic | 0.006098 | 0        | -0.072  |
| chr4.hg19:46971324C>T | rs7658410   | intronic | 0.189    | 0.2273   | -1.85   |
| chr4.hg19:46971359G>T | .           | intronic | 0        | 0.009091 | -3.41   |
| chr4.hg19:46971375T>A | rs144311104 | intronic | 0        | 0.009091 | -0.813  |
| chr4.hg19:46971491G>A | rs6447519   | intronic | 0.3598   | 0.3091   | -2.28   |
| chr4.hg19:46971544A>G | rs182087659 | intronic | 0        | 0.009091 | 2.16    |
| chr4.hg19:46971679T>C | rs17641603  | intronic | 0.01829  | 0        | -0.661  |
| chr4.hg19:46972009A>C | rs16859788  | intronic | 0.006098 | 0        | 2.12    |
| chr4.hg19:46972131C>T | rs16859794  | intronic | 0.3598   | 0.3091   | -3.43   |
| chr4.hg19:46972150T>C | rs28579132  | intronic | 0.3598   | 0.3091   | -1.78   |
| chr4.hg19:46972571A>T | rs139745050 | intronic | 0        | 0.009091 | -9.22   |
| chr4.hg19:46972719A>G | .           | intronic | 0.006098 | 0        | 2.84    |
| chr4.hg19:46972899C>A | rs2271429   | intronic | 0.3642   | 0.3091   | -3.89   |
| chr4.hg19:46973270G>A | rs45625131  | intronic | 0.03659  | 0.05455  | 1.07    |
| chr4.hg19:46973438A>G | rs17599416  | intronic | 0.01829  | 0        | -2.35   |
| chr4.hg19:46973459C>T | .           | intronic | 0        | 0.009091 | -4.56   |
| chr4.hg19:46973653C>G | rs113012502 | intronic | 0.0679   | 0.04545  | -0.721  |
| chr4.hg19:46973888T>C | rs1512135   | intronic | 0.01852  | 0        | 0.515   |
| chr4.hg19:46974572T>C | rs28588984  | intronic | 0.01829  | 0        | -3.28   |
| chr4.hg19:46974668A>G | rs142231249 | intronic | 0        | 0.01818  | 0.281   |

|                       |             |          |          |          |         |
|-----------------------|-------------|----------|----------|----------|---------|
| chr4.hg19:46974857C>G | rs16859805  | intronic | 0.006098 | 0        | 0.727   |
| chr4.hg19:46975116T>C | rs17599423  | intronic | 0.02439  | 0.01818  | -1.14   |
| chr4.hg19:46975155A>G | rs141274660 | intronic | 0.006098 | 0.009091 | 0.349   |
| chr4.hg19:46975656C>T | rs150215652 | intronic | 0.01852  | 0.009091 | -4.85   |
| chr4.hg19:46975674A>G | .           | intronic | 0        | 0.009091 | -2.73   |
| chr4.hg19:46976059G>A | rs187055104 | intronic | 0        | 0.009091 | -2.04   |
| chr4.hg19:46977627A>G | .           | intronic | 0.006098 | 0        | -4.36   |
| chr4.hg19:46977693T>C | .           | intronic | 0        | 0.009091 | 1.52    |
| chr4.hg19:46978365C>A | rs3792210   | intronic | 0.006098 | 0        | 1.38    |
| chr4.hg19:46978492A>G | rs191936715 | intronic | 0        | 0.009091 | -1.88   |
| chr4.hg19:46978671A>G | rs186914131 | intronic | 0.01235  | 0        | 1.6     |
| chr4.hg19:46979293A>G | .           | intronic | 0.006098 | 0        | 0.774   |
| chr4.hg19:46979366A>G | rs74332607  | intronic | 0.02439  | 0        | 0       |
| chr4.hg19:46980679G>T | rs13132953  | intronic | 0.4024   | 0.3636   | 0.427   |
| chr4.hg19:46981192G>A | rs114854980 | intronic | 0.006098 | 0.02727  | 1.04    |
| chr4.hg19:46981282C>T | .           | intronic | 0        | 0.009091 | -3.36   |
| chr4.hg19:46981342A>G | rs41265719  | intronic | 0.006098 | 0.03636  | 0.682   |
| chr4.hg19:46981374C>T | rs41265721  | intronic | 0.006098 | 0.009091 | 1.32    |
| chr4.hg19:46981512G>C | rs182898708 | intronic | 0.006098 | 0        | -0.294  |
| chr4.hg19:46981522A>G | .           | intronic | 0        | 0.009091 | -0.627  |
| chr4.hg19:46981623C>T | .           | intronic | 0.006098 | 0        | 0.83    |
| chr4.hg19:46981834T>A | .           | intronic | 0        | 0.009091 | 1.6     |
| chr4.hg19:46981880C>T | rs149960734 | intronic | 0.04938  | 0.009091 | -2.51   |
| chr4.hg19:46981907A>G | .           | intronic | 0        | 0.009091 | -3.31   |
| chr4.hg19:46982218T>G | rs17641660  | intronic | 0.03659  | 0.02727  | 1.48    |
| chr4.hg19:46982309C>T | rs10517171  | intronic | 0.01235  | 0        | 0.431   |
| chr4.hg19:46982434T>G | rs10517172  | intronic | 0.01235  | 0        | 3.99    |
| chr4.hg19:46982496A>C | rs10517173  | intronic | 0.01235  | 0        | 0.285   |
| chr4.hg19:46982562C>T | .           | intronic | 0.006098 | 0        | -1.88   |
| chr4.hg19:46982678A>G | .           | intronic | 0.006098 | 0        | -0.748  |
| chr4.hg19:46982826G>A | rs10517174  | intronic | 0.01235  | 0        | -1.31   |
| chr4.hg19:46982984G>A | rs10517175  | intronic | 0.01235  | 0        | 4.36    |
| chr4.hg19:46983062T>G | rs73813760  | intronic | 0.01235  | 0        | -0.627  |
| chr4.hg19:46983078C>A | rs73813761  | intronic | 0.01235  | 0        | 0.0682  |
| chr4.hg19:46983118A>G | rs192188284 | intronic | 0.006098 | 0        | 1.03    |
| chr4.hg19:46983360G>T | rs75253498  | intronic | 0.006098 | 0        | 0.869   |
| chr4.hg19:46983522A>G | rs13130893  | intronic | 0.3841   | 0.3455   | -2.6    |
| chr4.hg19:46983662C>T | rs181264330 | intronic | 0.006098 | 0        | 0.156   |
| chr4.hg19:46983708T>C | rs149165904 | intronic | 0.006098 | 0        | 0.939   |
| chr4.hg19:46983765T>C | rs60662599  | intronic | 0.006098 | 0        | -1.94   |
| chr4.hg19:46984086C>T | rs74865156  | intronic | 0.006098 | 0        | -0.0935 |
| chr4.hg19:46984608C>T | rs114590113 | intronic | 0.01829  | 0.02727  | 0.27    |
| chr4.hg19:46984714G>A | rs190910464 | intronic | 0.0122   | 0        | -5.59   |
| chr4.hg19:46984785G>A | rs144035024 | intronic | 0.006098 | 0.009091 | -2.5    |
| chr4.hg19:46984851T>G | rs2036940   | intronic | 0.01235  | 0        | -0.149  |
| chr4.hg19:46984932A>G | rs186809808 | intronic | 0        | 0.01818  | -1.22   |
| chr4.hg19:46985062C>T | rs13117953  | intronic | 0.06707  | 0.08182  | -2.75   |

|                       |             |            |          |          |        |
|-----------------------|-------------|------------|----------|----------|--------|
| chr4.hg19:46985378C>A | .           | intronic   | 0.006098 | 0        | 3.95   |
| chr4.hg19:46985459G>A | rs115762610 | intronic   | 0.006098 | 0        | 1.06   |
| chr4.hg19:46985750A>C | rs7694035   | intronic   | 0.3171   | 0.3545   | 1.07   |
| chr4.hg19:46985805T>G | rs61409453  | intronic   | 0.01235  | 0        | 3.84   |
| chr4.hg19:46985905G>A | .           | intronic   | 0        | 0.009091 | -0.669 |
| chr4.hg19:46986138G>T | .           | intronic   | 0.006098 | 0        | 0.596  |
| chr4.hg19:46986332C>T | .           | intronic   | 0.006098 | 0        | -3.36  |
| chr4.hg19:46986614A>G | .           | intronic   | 0.006098 | 0        | -0.204 |
| chr4.hg19:46987026A>G | rs189422096 | intronic   | 0.006098 | 0.009091 | 3.48   |
| chr4.hg19:46987105A>G | .           | intronic   | 0.006098 | 0        | 2.45   |
| chr4.hg19:46987315C>T | rs79535621  | intronic   | 0        | 0.009091 | -3.98  |
| chr4.hg19:46987332T>G | rs113614952 | intronic   | 0.006173 | 0        | -3.2   |
| chr4.hg19:46987936C>T | rs148941125 | intronic   | 0.006098 | 0.01818  | -4.69  |
| chr4.hg19:46988174G>T | .           | intronic   | 0        | 0.009091 | -2.39  |
| chr4.hg19:46988953T>C | rs116837070 | intronic   | 0.0122   | 0.009091 | 0.506  |
| chr4.hg19:46989494C>T | .           | intronic   | 0.006098 | 0        | -1.46  |
| chr4.hg19:46990101T>A | rs149447470 | intronic   | 0.02439  | 0.01818  | 0.661  |
| chr4.hg19:46990188A>C | rs114134151 | intronic   | 0.05488  | 0.009091 | -2.59  |
| chr4.hg19:46991015C>T | .           | intronic   | 0.006098 | 0        | -1.22  |
| chr4.hg19:46991056C>A | .           | intronic   | 0.006098 | 0        | -2.9   |
| chr4.hg19:46991257G>A | rs140502291 | intronic   | 0.01829  | 0.01818  | 0.798  |
| chr4.hg19:46991296C>T | .           | intronic   | 0        | 0.009091 | 2.28   |
| chr4.hg19:46992062C>T | .           | intronic   | 0.006098 | 0        | -3.13  |
| chr4.hg19:46993345T>C | rs16859829  | intronic   | 0.006098 | 0.01818  | 1.16   |
| chr4.hg19:46993562G>C | rs11735333  | intronic   | 0.4383   | 0.4      | 1.89   |
| chr4.hg19:46993664G>A | .           | intronic   | 0        | 0.009091 | -3.55  |
| chr4.hg19:46994430A>T | .           | intronic   | 0        | 0.009091 | 2      |
| chr4.hg19:46994463G>A | .           | intronic   | 0        | 0.009091 | 1.79   |
| chr4.hg19:46994495C>A | rs3792211   | intronic   | 0.4383   | 0.4      | 2.69   |
| chr4.hg19:46995050G>C | rs112472467 | intronic   | 0.0122   | 0.009091 | 1.87   |
| chr4.hg19:46995366G>T | rs2229940   | exonic     | 0.4383   | 0.4      | 2.98   |
| chr4.hg19:46995653G>T | rs13151759  | UTR5       | 0.4321   | 0.4      | 4.83   |
| chr4.hg19:46995660G>A | rs13151769  | UTR5       | 0.4321   | 0.3909   | 1.34   |
| chr4.hg19:46996469G>A | rs3762608   | intergenic | 0.0122   | 0.009091 | -1.67  |
| chr4.hg19:46996470A>G | rs3762609   | intergenic | 0.2346   | 0.2019   | -1.29  |
| chr4.hg19:46996545G>C | rs3762610   | intergenic | 0.006173 | 0.009091 | -3.26  |
| chr4.hg19:46996824A>G | rs186233707 | intergenic | 0        | 0.009091 | -3.14  |
| chr4.hg19:46997288G>A | rs3762611   | intergenic | 0.006173 | 0.009091 | -1.08  |
| chr4.hg19:46997524T>G | rs62303734  | intergenic | 0.02439  | 0.01818  | -1.26  |
| chr4.hg19:46997585T>A | rs12512719  | intergenic | 0.006098 | 0.009091 | 0.787  |
| chr4.hg19:46997804G>T | rs182938548 | intergenic | 0.006098 | 0        | -2.27  |
| chr4.hg19:46997913G>A | rs2055940   | intergenic | 0.4198   | 0.3727   | -4.56  |
| chr4.hg19:46998390T>A | .           | intergenic | 0.006098 | 0        | 2.06   |
| chr4.hg19:46998410T>C | rs16859842  | intergenic | 0.006173 | 0.009091 | -0.713 |
| chr4.hg19:46998880C>T | rs979273    | intergenic | 0.4695   | 0.434    | 1.8    |
| chr4.hg19:46998954T>C | .           | intergenic | 0        | 0.009091 | 2.65   |
| chr4.hg19:46998968G>C | rs116692820 | intergenic | 0        | 0.009091 | -3.4   |

|                       |             |            |          |          |         |
|-----------------------|-------------|------------|----------|----------|---------|
| chr4.hg19:46999086T>C | rs73813771  | intergenic | 0.006173 | 0.009091 | 1.51    |
| chr4.hg19:46999164C>G | .           | intergenic | 0        | 0.009259 | 1.98    |
| chr4.hg19:46999235A>G | rs7683042   | intergenic | 0.439    | 0.4057   | 1.64    |
| chr4.hg19:46999452T>A | .           | intergenic | 0        | 0.01852  | 0.158   |
| chr4.hg19:46999488C>T | .           | intergenic | 0.006098 | 0        | -1.69   |
| chr4.hg19:46999489G>A | rs62303735  | intergenic | 0.03659  | 0.03636  | 0.337   |
| chr4.hg19:47000043C>T | rs73813772  | intergenic | 0.006173 | 0.009091 | -2.55   |
| chr4.hg19:47000084G>A | rs182903944 | intergenic | 0        | 0.009091 | -0.409  |
| chr4.hg19:47000579T>C | rs140289800 | intergenic | 0.03659  | 0.03636  | 0.39    |
| chr4.hg19:47000617G>A | rs184476857 | intergenic | 0        | 0.009091 | -1.07   |
| chr4.hg19:47000644G>A | rs150289418 | intergenic | 0.006173 | 0.009091 | -0.781  |
| chr4.hg19:47000654G>A | rs188360853 | intergenic | 0.03049  | 0.009091 | 0.39    |
| chr4.hg19:47000717C>T | .           | intergenic | 0        | 0.009091 | 0.0465  |
| chr4.hg19:47000894T>G | .           | intergenic | 0.006098 | 0        | -0.933  |
| chr4.hg19:47001050C>T | rs74686024  | intergenic | 0.02439  | 0.02727  | -3.91   |
| chr4.hg19:47001095C>G | rs73813773  | intergenic | 0.006173 | 0.009091 | -5.6    |
| chr4.hg19:47001096A>G | .           | intergenic | 0        | 0.009091 | -5.38   |
| chr4.hg19:47001432T>C | rs11729763  | intergenic | 0.02439  | 0.01818  | 0.947   |
| chr4.hg19:47001790A>G | rs11729000  | intergenic | 0.006098 | 0.009091 | -0.47   |
| chr4.hg19:47001870T>C | rs75197150  | intergenic | 0        | 0.009091 | 0.235   |
| chr4.hg19:47002051A>G | rs10938467  | intergenic | 0.2134   | 0.2182   | -0.47   |
| chr4.hg19:47002177A>G | rs11729961  | intergenic | 0.006098 | 0        | 1.58    |
| chr4.hg19:47002378C>T | rs6447520   | intergenic | 0.4512   | 0.3704   | 1.34    |
| chr4.hg19:47002457T>A | .           | intergenic | 0.006098 | 0        | -0.638  |
| chr4.hg19:47002475T>C | rs59481829  | intergenic | 0.006098 | 0.009091 | 1.91    |
| chr4.hg19:47002708G>C | .           | intergenic | 0        | 0.009091 | 0.361   |
| chr4.hg19:47002804C>A | rs146853986 | intergenic | 0        | 0.009091 | 0.546   |
| chr4.hg19:47002984C>T | rs1159316   | intergenic | 0.4756   | 0.4182   | 0.964   |
| chr4.hg19:47003076T>C | rs1159315   | intergenic | 0.4085   | 0.4182   | 2.2     |
| chr4.hg19:47003133T>C | rs13116518  | intergenic | 0.439    | 0.4182   | -0.0161 |
| chr4.hg19:47003245C>T | rs13136474  | intergenic | 0.4634   | 0.3704   | -0.317  |
| chr4.hg19:47003309C>G | rs6447521   | intergenic | 0.08537  | 0.09091  | 0.158   |
| chr4.hg19:47003311C>T | rs371585865 | intergenic | 0.006098 | 0.009091 | 0.158   |
| chr4.hg19:47003316C>T | rs6447522   | intergenic | 0.2927   | 0.2547   | -0.317  |
| chr4.hg19:47003317G>A | rs6447523   | intergenic | 0.2927   | 0.2547   | -0.317  |
| chr4.hg19:47003321A>G | rs113294607 | intergenic | 0.03704  | 0.009091 | -1.35   |
| chr4.hg19:47003323C>G | .           | intergenic | 0        | 0.01818  | -1.15   |
| chr4.hg19:47003335A>G | .           | intergenic | 0        | 0.009091 | 0.666   |
| chr4.hg19:47003349T>C | rs373147704 | intergenic | 0        | 0.01852  | -0.727  |
| chr4.hg19:47003351T>G | rs377301634 | intergenic | 0        | 0.02727  | -0.727  |
| chr4.hg19:47003361G>A | rs191758928 | intergenic | 0        | 0.01818  | -0.317  |
| chr4.hg19:47003370A>G | .           | intergenic | 0        | 0.009091 | -0.721  |
| chr4.hg19:47003372G>A | rs7684209   | intergenic | 0.08537  | 0.07273  | -0.637  |
| chr4.hg19:47003380G>C | rs6447524   | intergenic | 0.2654   | 0.2685   | -0.317  |
| chr4.hg19:47003381A>G | rs35128586  | intergenic | 0.2317   | 0.2      | -0.317  |
| chr4.hg19:47003410T>C | rs190515423 | intergenic | 0.006098 | 0        | -0.317  |
| chr4.hg19:47003429A>G | rs146975148 | intergenic | 0        | 0.009091 | -1.35   |

|                       |             |            |          |          |          |
|-----------------------|-------------|------------|----------|----------|----------|
| chr4.hg19:47003449A>G | rs138144998 | intergenic | 0.0122   | 0        | -0.56    |
| chr4.hg19:47003450T>C | rs149371685 | intergenic | 0.0122   | 0.009091 | -0.994   |
| chr4.hg19:47003560G>A | rs4695185   | intergenic | 0.006173 | 0.009091 | -1.92    |
| chr4.hg19:47003587T>C | rs185179599 | intergenic | 0.01829  | 0        | -0.369   |
| chr4.hg19:47003702A>G | rs4695186   | intergenic | 0.03659  | 0.06364  | 0.736    |
| chr4.hg19:47003757A>G | rs115587045 | intergenic | 0        | 0.009091 | -0.611   |
| chr4.hg19:47003829T>G | rs4695187   | intergenic | 0.4198   | 0.4273   | -5.73    |
| chr4.hg19:47004021G>A | rs146060855 | intergenic | 0.006098 | 0        | -0.00594 |
| chr4.hg19:47004037A>G | rs1512144   | intergenic | 0.4268   | 0.4364   | 0.629    |
| chr4.hg19:47004098A>T | rs1512143   | intergenic | 0.4198   | 0.4259   | 0.558    |
| chr4.hg19:47004247T>A | .           | intergenic | 0.006098 | 0        | -1.92    |
| chr4.hg19:47004305G>A | rs1512142   | intergenic | 0.3765   | 0.3981   | -4.74    |
| chr4.hg19:47005013G>A | rs76955246  | intergenic | 0.02439  | 0.01852  | -2.01    |
| chr4.hg19:47005105A>C | .           | intergenic | 0.006329 | 0        | 0.0403   |
