# Supplementary material
Source: PubMed Central journal article supplement (PMC5792317)
Supplement: NIHMS921357-supplement-10048_2017_529_MOESM3_ESM.pdf [file NIHMS921357-supplement-10048_2017_529_MOESM3_ESM.pdf]

ESM\_3 Table of all short insertion deletion variants identified in the *GABRA4* region

| Variant            | dbSNP138 ID | Functional Category | ASD Cases MAF | Controls MAF | GERP Score |
|--------------------|-------------|---------------------|---------------|--------------|------------|
| chr4.hg19:46919956 | .           | intergenic          | 0.00          | 0.01         | 1.91       |
| chr4.hg19:46920452 | .           | intergenic          | 0.01          | 0.00         | 0.284      |
| chr4.hg19:46922091 | .           | UTR3                | 0.01          | 0.00         | 3.79       |
| chr4.hg19:46923150 | .           | UTR3                | 0.04          | 0.04         | -2.63      |
| chr4.hg19:46923810 | .           | UTR3                | 0.01          | 0.01         | -2.99      |
| chr4.hg19:46925191 | .           | UTR3                | 0.01          | 0.00         | 0.302      |
| chr4.hg19:46925360 | rs34833857  | UTR3                | 0.37          | 0.33         | -3.33      |
| chr4.hg19:46928057 | .           | UTR3                | 0.00          | 0.01         | 2.93       |
| chr4.hg19:46928091 | rs3046811   | UTR3                | 0.17          | 0.09         | -4.77      |
| chr4.hg19:46932652 | rs34470126  | intronic            | 0.29          | 0.23         | NA         |
| chr4.hg19:46932853 | rs111360718 | intronic            | 0.01          | 0.00         | 2.97       |
| chr4.hg19:46940071 | .           | intronic            | 0.04          | 0.04         | 3.33       |
| chr4.hg19:46944642 | .           | intronic            | 0.17          | 0.09         | 0.225      |
| chr4.hg19:46944643 | .           | intronic            | 0.01          | 0.01         | NA         |
| chr4.hg19:46953812 | rs9291299   | intronic            | 0.57          | 0.52         | NA         |
| chr4.hg19:46956418 | rs33944090  | intronic            | 0.37          | 0.31         | 0.225      |
| chr4.hg19:46956573 | rs60422399  | intronic            | 0.02          | 0.01         | -0.782     |
| chr4.hg19:46959298 | rs33980071  | intronic            | 0.95          | 0.99         | -0.415     |
| chr4.hg19:46961775 | rs67861758  | intronic            | 0.05          | 0.02         | 0.076      |
| chr4.hg19:46961793 | .           | intronic            | 0.00          | 0.01         | -2.15      |
| chr4.hg19:46961835 | rs34315359  | intronic            | 0.04          | 0.02         | -1.31      |
| chr4.hg19:46961851 | rs34220386  | intronic            | 0.12          | 0.05         | -1.18      |
| chr4.hg19:46963569 | .           | intronic            | 0.01          | 0.00         | 0.53       |
| chr4.hg19:46964292 | rs3047535   | intronic            | 0.27          | 0.27         | 0.225      |
| chr4.hg19:46965342 | .           | intronic            | 0.01          | 0.00         | 0.235      |
| chr4.hg19:46966655 | rs150393866 | intronic            | 0.02          | 0.00         | 1.4        |
| chr4.hg19:46969371 | .           | intronic            | 0.04          | 0.03         | 1.29       |
| chr4.hg19:46970391 | rs112787221 | intronic            | 0.01          | 0.02         | -2.5       |
| chr4.hg19:46972724 | rs142227628 | intronic            | 0.30          | 0.26         | 3.76       |
| chr4.hg19:46978371 | rs33955741  | intronic            | 0.12          | 0.18         | 0.13       |
| chr4.hg19:46979335 | rs35997181  | intronic            | 0.10          | 0.05         | -1.28      |
| chr4.hg19:46979336 | rs35997181  | intronic            | 0.01          | 0.02         | -1.28      |
| chr4.hg19:46979338 | rs35997181  | intronic            | 0.01          | 0.00         | -1.54      |
| chr4.hg19:46979340 | rs35997181  | intronic            | 0.01          | 0.03         | 0.769      |
| chr4.hg19:46979344 | rs35997181  | intronic            | 0.01          | 0.01         | 0.769      |
| chr4.hg19:46979362 | rs150518504 | intronic            | 0.01          | 0.00         | -0.256     |
| chr4.hg19:46979411 | .           | intronic            | 0.01          | 0.01         | 1.37       |
| chr4.hg19:46980704 | rs71193889  | intronic            | 0.25          | 0.10         | -0.049     |
| chr4.hg19:46982061 | rs146269866 | intronic            | 0.03          | 0.04         | 1.98       |
| chr4.hg19:46982390 | rs59824351  | intronic            | 0.47          | 0.46         | -7.82      |
| chr4.hg19:46990211 | .           | intronic            | 0.01          | 0.02         | -6.6       |
| chr4.hg19:46993206 | rs66474766  | intronic            | 0.43          | 0.40         | NA         |
| chr4.hg19:46993741 | rs71759310  | intronic            | 0.13          | 0.10         | 0.033      |
| chr4.hg19:46993742 | rs71759310  | intronic            | 0.09          | 0.08         | 1.46       |
| chr4.hg19:46993874 | .           | intronic            | 0.02          | 0.00         | -3.38      |
| chr4.hg19:46994972 | rs3215202   | intronic            | 0.34          | 0.33         | -0.605     |
| chr4.hg19:46998087 | rs35038999  | intergenic          | 0.12          | 0.11         | -2.28      |
| chr4.hg19:46999758 | rs111362341 | intergenic          | 0.04          | 0.05         | -1.5       |
| chr4.hg19:46999759 | rs111362341 | intergenic          | 0.00          | 0.01         | -1.74      |
| chr4.hg19:47000749 | .           | intergenic          | 0.01          | 0.02         | -1.05      |
| chr4.hg19:47000884 | rs80009800  | intergenic          | 0.04          | 0.05         | -1.36      |
| chr4.hg19:47005096 | rs34059067  | intergenic          | 0.46          | 0.45         | -1.64      |
