# Supplementary material
Source: PubMed Central journal article supplement (PMC5792317)
Supplement: NIHMS921357-supplement-10048_2017_529_MOESM4_ESM.pdf [file NIHMS921357-supplement-10048_2017_529_MOESM4_ESM.pdf]

ESM\_4 Rare variants identified in *GABRA4* overlapping with ENCODE features from Fetal CNS

| Variant               | dbSNP138 ID | Functional Category | ASD Cases MAF | Controls MAF | 1000 Genomes Release 3 MAF | DNase Hypersensitiv | CTCF Binding | Putative Enhancers (H3K4me1 and/or H3K9ac) |
|-----------------------|-------------|---------------------|---------------|--------------|----------------------------|---------------------|--------------|--------------------------------------------|
| chr4 hg19:46933966T>C | rs17641386  | intronic            | 0.3544        | 0.3333       | 0.230631                   | X                   | X            | X                                          |
| chr4 hg19:46933990T>C | rs17599158  | intronic            | 0.3563        | 0.3333       | 0.230631                   | X                   | X            | X                                          |
| chr4 hg19:46934014T>G | rs12508654  | intronic            | 0.3563        | 0.3333       | 0.371206                   | X                   | X            | X                                          |
| chr4 hg19:46934233A>G | rs74994602  | intronic            | 0.01829       | 0.009091     | 0.00698882                 | X                   | X            | X                                          |
| chr4 hg19:46936899A>G | rs6843462   | intronic            | 0.358         | 0.3273       | 0.557308                   | X                   |              |                                            |
| chr4 hg19:46937023C>T | rs75822667  | intronic            | 0.03049       | 0.01818      | 0.00938498                 | X                   |              |                                            |
| chr4 hg19:46939651C>A | rs189857459 | intronic            | 0.03125       | 0.009091     | 0.0061901                  |                     | X            |                                            |
| chr4 hg19:46939779T>C | .           | intronic            | 0.00625       | 0            | 0.00159744                 |                     | X            |                                            |
| chr4 hg19:46949319C>T | .           | intronic            | 0.006098      | 0            | 0.00159744                 | X                   |              | X                                          |
| chr4 hg19:46973270G>A | rs45625131  | intronic            | 0.03659       | 0.05455      | 0.00858626                 | X                   |              | X                                          |
| chr4 hg19:46978365C>A | rs3792210   | intronic            | 0.006098      | 0            | 0.0940495                  | X                   |              | X                                          |
| chr4 hg19:46981880C>T | rs149960734 | intronic            | 0.04938       | 0.009091     | 0.0155751                  | X                   |              |                                            |
| chr4 hg19:46981907A>G | .           | intronic            | 0             | 0.009091     | 0.000199681                | X                   |              |                                            |
| chr4 hg19:46983062T>G | rs73813760  | intronic            | 0.01235       | 0            | 0.13099                    | X                   |              | X                                          |
| chr4 hg19:46983078C>A | rs73813761  | intronic            | 0.01235       | 0            | 0.13099                    | X                   |              | X                                          |
| chr4 hg19:46983118A>G | rs192188284 | intronic            | 0.006098      | 0            | 0.000798722                | X                   |              | X                                          |
| chr4 hg19:46987026A>G | rs189422096 | intronic            | 0.006098      | 0.009091     | 0.000199681                | X                   |              |                                            |
| chr4 hg19:46994430A>T | .           | intronic            | 0             | 0.009091     | 0                          | X                   |              |                                            |
| chr4 hg19:46995050G>C | rs112472467 | intronic            | 0.0122        | 0.009091     | 0.00499201                 | X                   |              |                                            |
| chr4 hg19:46995366G>T | rs2229940   | exonic              | 0.4383        | 0.4          | 0.300719                   | X                   |              |                                            |
| chr4 hg19:46995653G>T | rs13151759  | UTR5                | 0.4321        | 0.4          | 0.326078                   | X                   |              |                                            |
| chr4 hg19:46995660G>A | rs13151769  | UTR5                | 0.4321        | 0.3909       | 0.325879                   | X                   |              |                                            |
| chr4 hg19:46996824A>G | rs186233707 | intergenic          | 0             | 0.009091     | 0.000199681                | X                   |              |                                            |
| chr4 hg19:47001790A>G | rs11729000  | intergenic          | 0.006098      | 0.009091     | 0.120607                   | X                   |              |                                            |
| chr4 hg19:47001870T>C | rs75197150  | intergenic          | 0             | 0.009091     | 0.00239617                 | X                   |              |                                            |
